# Supplementary material
Source: HighWire-hosted journal article supplement (https://tech.snmjournals.org/highwire/filestream/10376/field_highwire_adjunct_files/0/261979_Supplemental_Data.pdf)

Supplemental Figure 1. Low dose whole-body radioiodine scan shows focus of tracer uptake in the thyroid region suggestive of thyroid remnant (arrow).

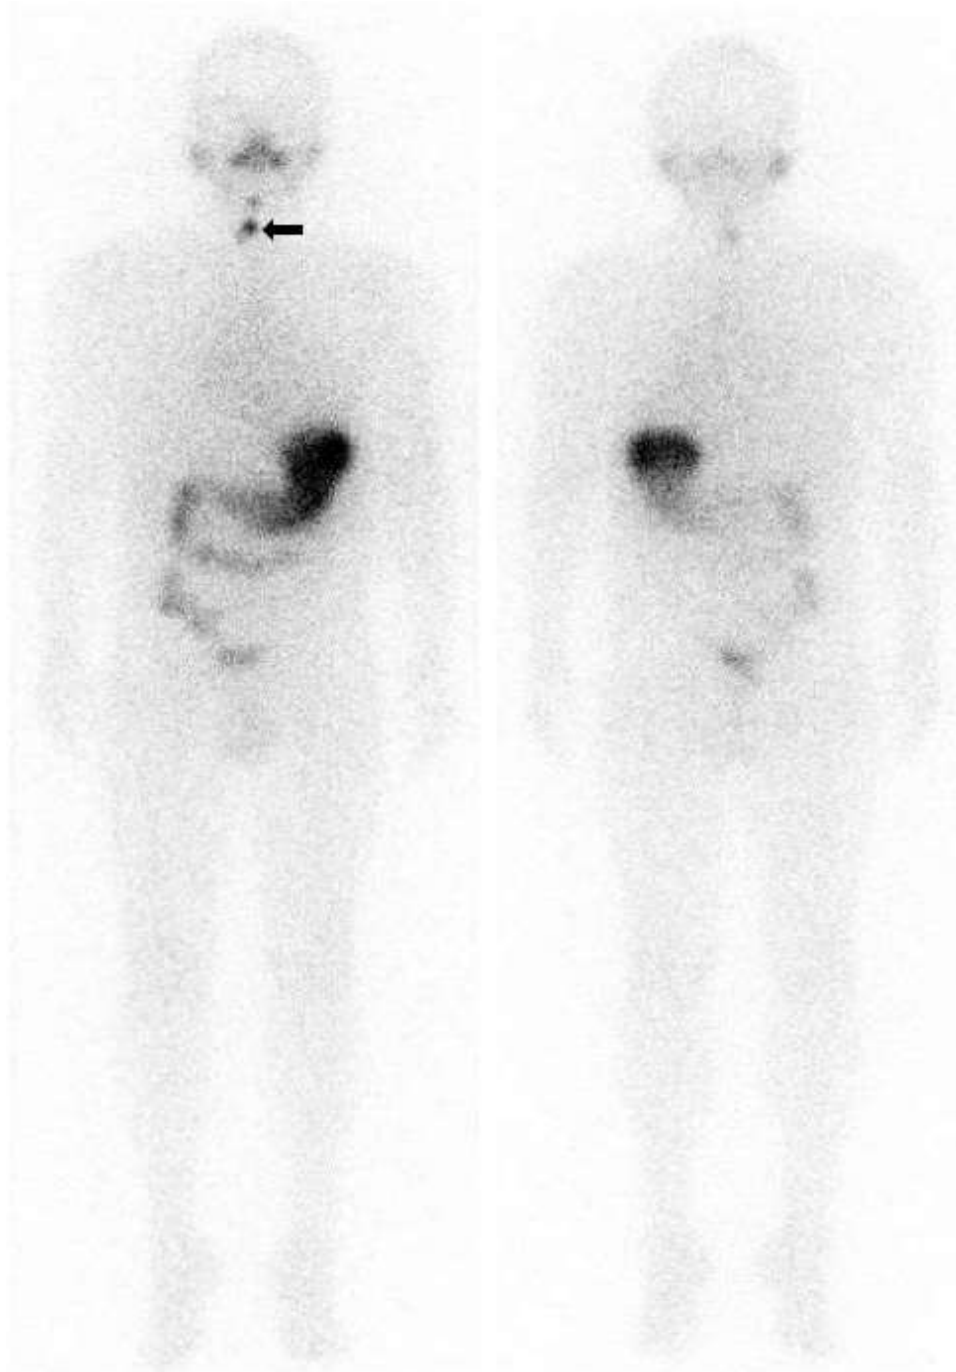

Supplemental Figure 2. Graph showing dose rate at stomach level at a distance of 1 metre from the patient at different time points during the course of treatment (Dialysis done at 48, 72 and 96 hours; arrows).

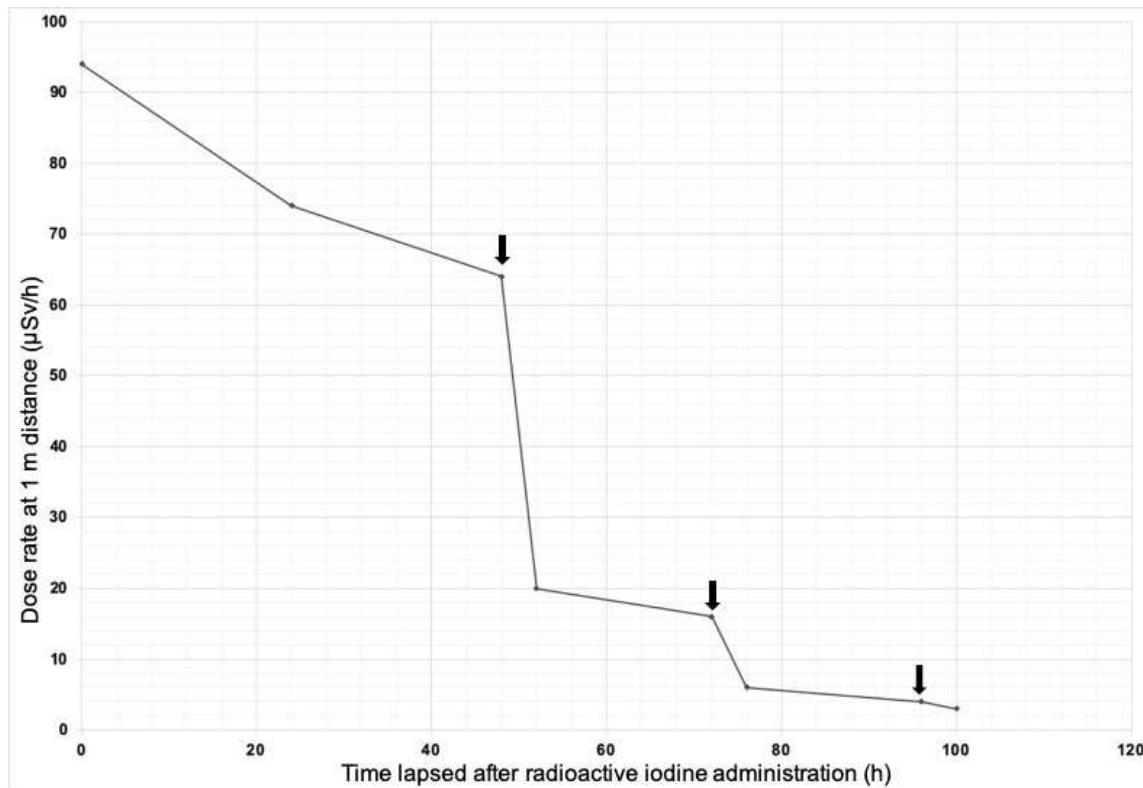

Supplemental Figure 3. Low dose whole-body radioiodine scan done after six months of radioiodine therapy shows resolution of tracer uptake in the thyroid region.

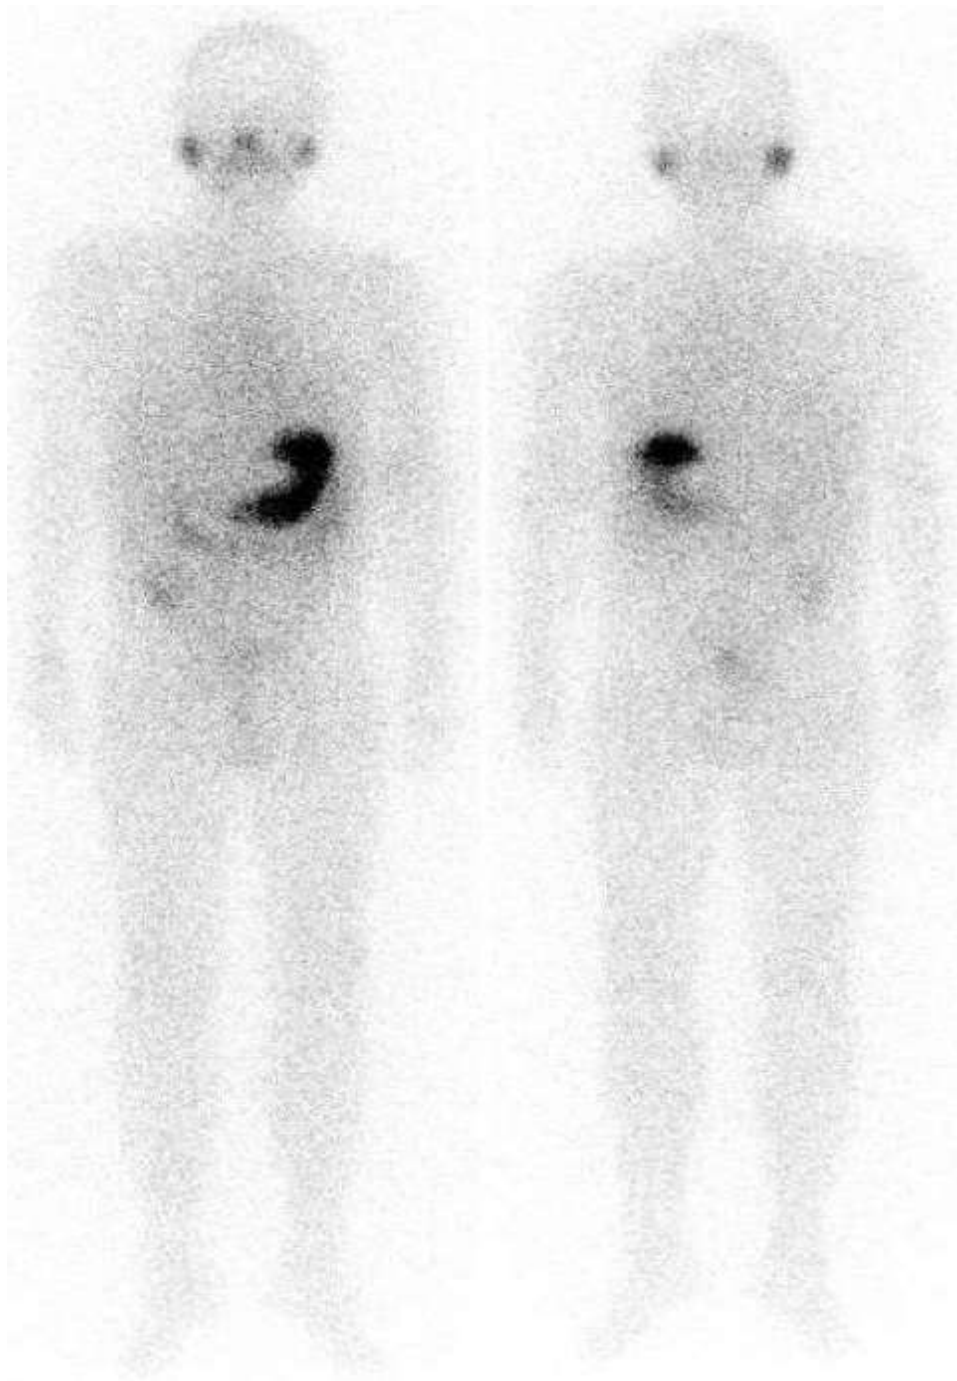

Supplement: 261979_Supplemental_Data.pdf [file 261979_Supplemental_Data.pdf]
